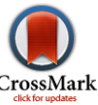

# Analysis of Oxidative Stress Status, Catalase and Catechol-O-Methyltransferase Polymorphisms in Egyptian Vitiligo Patients

Dina A. Mehaney<sup>1</sup>, Hebatallah A. Darwish<sup>2</sup>, Rehab A. Hegazy<sup>3</sup>, Mohammed M. Nooh<sup>2\*</sup>, Amira M. Tawdy<sup>3</sup>, Heba I. Gawdat<sup>3</sup>, Maha M. El-Sawalhi<sup>2</sup>

**1** Clinical and Chemical Pathology Department, Faculty of Medicine, Cairo University, Cairo, Egypt, **2** Biochemistry Department, Faculty of Pharmacy, Cairo University, Cairo, Egypt, **3** Dermatology Department, Faculty of Medicine, Cairo University, Cairo, Egypt

## Abstract

Vitiligo is the most common depigmentation disorder of the skin. Oxidative stress is implicated as one of the probable events involved in vitiligo pathogenesis possibly contributing to melanocyte destruction. Evidence indicates that certain genes including those involved in oxidative stress and melanin synthesis are crucial for development of vitiligo. This study evaluates the oxidative stress status, the role of catalase (*CAT*) and catechol-O-Methyltransferase (*COMT*) gene polymorphisms in the etiology of generalized vitiligo in Egyptians. Total antioxidant capacity (TAC) and malondialdehyde (MDA) levels as well as *CAT* exon 9 T/C and *COMT* 158 G/A polymorphisms were determined in 89 patients and 90 age and sex-matched controls. Our results showed significantly lower TAC along with higher MDA levels in vitiligo patients compared with controls. Meanwhile, genotype and allele distributions of *CAT* and *COMT* polymorphisms in cases were not significantly different from those of controls. Moreover, we found no association between both polymorphisms and vitiligo susceptibility. In conclusion, the enhanced oxidative stress with the lack of association between *CAT* and *COMT* polymorphisms and susceptibility to vitiligo in our patients suggest that mutations in other genes related to the oxidative pathway might contribute to the etiology of generalized vitiligo in Egyptian population.

**Citation:** Mehaney DA, Darwish HA, Hegazy RA, Nooh MM, Tawdy AM, et al. (2014) Analysis of Oxidative Stress Status, Catalase and Catechol-O-Methyltransferase Polymorphisms in Egyptian Vitiligo Patients. PLoS ONE 9(6): e99286. doi:10.1371/journal.pone.0099286

**Editor:** Michael G. Anderson, University of Iowa, United States of America

**Received:** January 7, 2014; **Accepted:** May 13, 2014; **Published:** June 10, 2014

**Copyright:** © 2014 Mehaney et al. This is an open-access article distributed under the terms of the Creative Commons Attribution License, which permits unrestricted use, distribution, and reproduction in any medium, provided the original author and source are credited.

**Funding:** This research was officially supported by the Medical Research Service of the Cairo University. The funders had no role in study design, data collection and analysis, decision to publish, or preparation of the manuscript.

**Competing Interests:** The authors have declared that no competing interests exist.

\* E-mail: mohamed.nooh@pharma.cu.edu.eg

## Introduction

Vitiligo is an acquired depigmentation disorder of the skin and hair, with a 0.5–2% incidence worldwide [1]. It is characterized by the loss of epidermal melanocytes that results in amelanotic lesions of variable size. Although the precise etiology of vitiligo is still obscure, it is assumed that vitiligo pathomechanisms represent a complex reaction pattern, involving multiple etiologic factors that ultimately contribute to melanocyte destruction [2]. Theories regarding loss of melanocytes are based on autoimmune cytotoxic T cells, oxidant-antioxidant imbalance, genetic factors, neural mechanisms or multifactorial mechanisms as in the haptenation theory [1,3–5].

Cellular autoimmunity is a key player in vitiligo pathogenesis as indicated by elevated levels of melanocyte-reactive cytotoxic T cells in the peripheral blood of vitiligo patients and by perilesional T-cell infiltration [6,7].

Oxidative stress may be another possible element implicated in melanocyte loss since the deleterious effects of epidermal hydrogen peroxide ( $H_2O_2$ ) overproduction and compromised antioxidant status have been demonstrated in lesional and non lesional epidermis as well as in melanocytes of vitiligo patients [8–14]. Nevertheless, it remains elusive whether this imbalance is the primary trigger for melanocyte degeneration in vitiligo or just a

secondary event to the immunological and inflammatory cascade that occurs in such multifactorial disease [2,15]. Furthermore, it was suggested that reactive oxygen species (ROS) and immune system may interact to initiate and/or amplify the pathogenic events in vitiligo [2,15].

Moreover, genetic factors play a major role in vitiligo pathogenesis [16–18]. Genes related to melanin biosynthesis, antioxidant system and regulation of autoimmunity have been implicated in vitiligo [19]. Catalase (*CAT*) is an important endogenous antioxidant enzyme that catalyzes  $H_2O_2$  detoxification. A number of *CAT* gene single-nucleotide polymorphisms (SNPs) and mutations have been associated with disease manifestations [20,21]. Although the SNP 389 T/C in the 9th exon of the *CAT* gene is a silent substitution, some reports have indicated that such SNP could have a role in the disposition for vitiligo in different populations [22–26]. Hence, it is plausible that 389 T/C polymorphism could be a genetic marker linked to other *CAT* gene mutations that are deleterious to the expression or the activity of the enzyme [24].

In melanocytes, catechol-O-methyltransferase (*COMT*) can prevent the formation of toxic *O*-quinones during melanin synthesis [27]. Human *COMT* has two length variants, the soluble (S-*COMT*) and the membrane-bound (MB-*COMT*) [28]. A single base-pair change (G/A) in exon 4 of the *COMT* gene,

resulting in an amino acid change (Val/Met) at codon 158 of MB-COMT or codon 108 of S-COMT, reduces the thermostability and the activity of the enzyme [29]. Association studies have implicated this functional polymorphism in various disorders [30–32]. Since COMT takes part in the autocytotoxic/metabolic impairment of melanocytes and other epidermal cells in vitiligo, the *COMT*-158 G/A polymorphism might be involved in the etiology of vitiligo [33].

To date little information is available about the oxidative stress status, *CAT* and *COMT* polymorphisms in the Egyptian vitiligo patients, therefore, the present study was undertaken to evaluate the antioxidant status as well as the role of *CAT*-389 T/C and *COMT*-158 G/A SNPs in the etiology of vitiligo in the Egyptian population.

## Materials and Methods

### Study participants

A total of 179 participants were enrolled in the study; 89 patients with generalized vitiligo and 90 age and sex-matched control subjects. The vitiligo patients were regular visitors of the dermatology outpatient clinic of Cairo University Hospital. All patients were examined by dermatologists and inclusion was based on both clinical examination and appropriate investigations. Patients receiving systemic or topical immunomodulatory treatment for vitiligo within three months prior to the study were excluded. Patients with other dermatological diseases or malignancy were also considered unfit to be included. Control subjects were individuals who had come to the hospital for a health examination or for blood donation and they had no clinical evidence or family history of vitiligo or autoimmune diseases.

The study was approved by the Research Ethics Committee (REC) for experimental and clinical studies at Faculty of Pharmacy, Cairo University, Cairo, Egypt. The importance of the study was explained to all participants and written consent was obtained from all subjects before performing the studies. REC approved the written consent procedure for participants. The study was conducted according to the Declaration of Helsinki Principles.

### Clinical examination

A detailed history was retrieved from each patient through answering a prepared questionnaire to document the age and sex of the patient, the presence of a positive family history (in a first degree relative), as well as the duration and course of the disease which was defined as being stable or progressive according to the Vitiligo Disease Activity (VIDA) Score. Both VIDA 0 (when disease has remained stable 1 year or more) and VIDA -1 (when disease has remained stable with spontaneous repigmentation 1 year or more) were considered stable vitiligo. Whereas VIDA +1 (Active 6–12 months), +2 (Active 3–6 months), +3 (Active 6 weeks–3 months) and VIDA +4 (Active 6 weeks or less) were all interpreted as the disease being progressive [34]. Furthermore each participant was asked to complete a stress score questionnaire to evaluate the degree of stress [35]. Any participant with a stress score exceeding 15/40 was considered as being “positive” for stress.

Clinical assessment was performed to determine the subtype of vitiligo (vulgaris, acrofacial or mixed), site of vitiligo, as well as its extent and degree of depigmentation. Accordingly the Vitiligo Area Scoring Index (VASI) was interpreted for each patient [36].

### Blood sampling and DNA extraction

Five ml of venous blood were withdrawn into an EDTA tube. DNA was extracted from the peripheral blood leucocytes using the standard salting out technique [37]. The separated plasma was used for assessment of oxidative stress markers; the total antioxidant capacity (TAC) and malondialdehyde (MDA) levels.

### Determination of TAC

TAC was determined using kit provided by Biodiagnostic, Egypt, based on the method of Koracevic et al. [38]. This method depends upon the reaction of antioxidants in the sample with a defined amount of exogenously provided H<sub>2</sub>O<sub>2</sub> causing its decomposition. The residual H<sub>2</sub>O<sub>2</sub> is determined by an enzymatic reaction which involves the conversion of 3, 5-dichloro-2-hydroxybenzenesulphonate to a colored product measured colorimetrically at 505 nm.

### Determination of MDA level

MDA level as index of lipid peroxidation was measured according to the method of Mihara and Uchiyama [39]. In brief, MDA reacts with thiobarbituric acid in acidic medium giving a pink-colored complex that can be measured spectrophotometrically, using 1, 1, 3, 3-tetramethoxypropane as standard.

### Genotyping and polymorphisms

The T/C SNP in exon 9 of *CAT* gene (rs769217) was investigated using the polymerase chain reaction–restriction fragment length polymorphism (PCR/RFLP) analysis according to Park et al. [26]. For amplification, the following primers were used: Forward 5′-GCCGCCTTTTTGCTATCCT-3′, Reverse-5′-TCCCGCCCATCTGCTCCAC-3′. DNA samples (100 ng) underwent initial denaturation at 94°C for 3 minutes (1 cycle) followed by 35 amplification cycles in the thermal cycler PCR Express (Thermo Hybaid, Middlesex, UK), each cycle consisting of denaturation at 94°C for 30 seconds, annealing for 30 seconds, and extension at 72°C for 30 seconds, with a final extension step of incubation at 72°C for 5 minutes. The PCR product (202 bp) was digested by BstXI enzyme (MBI Fermentas, Vilnius, Lithuania). The TT genotype produced 108 and 94 bp fragments, the CC genotype produced 202 bp fragment and the TC genotype produced 202, 108, 94 bp fragments.

The *COMT* 158 G/A SNP (rs4680) was studied using PCR/RFLP analysis according to Erdal et al. [40]. For amplification, the following primers were used: Forward, -5′-GGAGCTGGGG-GCCTACTGTG-3′, Reverse-5′-GGCCCTTTTTCCAGGTC-TGAC A-3′. DNA samples (100 ng) underwent initial denaturation at 94°C for 3 minutes (1 cycle) followed by 35 amplification cycles in the thermal cycler PCR Express (Thermo Hybaid, Middlesex, UK), each cycle consisting of denaturation at 94°C for 1 minute, annealing at 60°C for 1 minute, and extension at 72°C for 1 minute, with a final extension step at 72°C for 7 minutes. The PCR product of 185 base pair (bp) was digested with the NlaIII enzyme (MBI Fermentas, Vilnius, Lithuania). The *COMT*-GG genotype produced 114, 36 and 35 bp fragments, the *COMT*-AA genotype produced 96, 35, 36, and 18 bp fragments, and the *COMT*-GA genotype produced 114, 96, 36, 35, and 18 bp fragments.

To identify the genotypes of *CAT* and *COMT* polymorphisms, the digestion fragments were separated by 15% polyacrylamide gel using the BioRad Mini-Protean tetra gel system (Bio-Rad, Hercules, CA, USA) and stained with ethidium bromide.

**Table 1. Plasma TAC and MDA levels in vitiligo patients and controls.**

| Variable      | Vitiligo patients (N = 89) | Controls (N = 90) | p-value |
|---------------|----------------------------|-------------------|---------|
| TAC (mM)      | 1.33(0.37)                 | 1.52(0.35)        | 0.001   |
| MDA (nmol/ml) | 5.28(1.41)                 | 4.34(1.04)        | <0.001  |

Data are presented as Mean (SD). TAC; total antioxidant capacity, MDA; malondialdehyde.  
doi:10.1371/journal.pone.0099286.t001

## DNA sequencing

The restriction enzyme analyses were confirmed by sequencing analysis. PCR amplifications were done using the same primers used before. The PCR products were recovered from agarose gels using MinElute Gel Extraction Kit (QIAGEN, Inc., CA, USA) according to the manufacturer's instructions. Sequencing with appropriate oligonucleotide primers was carried out by using a BigDye Terminator Version 3.1 Cycle Sequencing Kit (Applied Biosystems, Foster City, CA, USA) and a 310 automatic DNA sequencer (Applied Biosystems, Foster City, CA, USA).

## Statistical analysis

Data were analyzed using IBM SPSS Advanced Statistics version 20.0 (SPSS Inc., Chicago, IL). Numerical data were expressed as mean and standard deviation or median and range as appropriate. Qualitative data were expressed as frequency and percentage. Chi-square test (Fisher's exact test) was used to examine the relation between qualitative variables. For quantitative data, comparison between vitiligo patients and controls was done using Mann-Whitney test. Comparison between 3 groups was done using Kruskal-Wallis test (non-parametric ANOVA). Odds ratio (OR) with its 95% confidence interval (CI) were obtained using a logistic regression model and were used for risk estimation. Hardy-Weinberg Equilibrium was tested for *CAT* and *COMT* genes in vitiligo group. A  $p$ -value <0.05 was considered significant.

## Results

### Characteristics of the study population

This study included 89 patients with generalized vitiligo and 90 age and sex-matched controls. The mean (SD) age was  $32.3 \pm 13.3$  years for cases and  $32.7 \pm 13.6$  years for controls ( $p = 0.8$ ). In the cases, the frequency of males and females were 31.4% ( $n = 28$ ) and 68.6% ( $n = 61$ ) respectively, while in the controls, 40% ( $n = 36$ ) were males and 60% ( $n = 54$ ) were females ( $p = 0.3$ ).

The mean (SD) duration of the disease in patients was  $5.43 \pm 5.6$  years. The mean (SD) VASI score was  $14.4 \pm 7.6$ . The most frequent subtype was vitiligo vulgaris in 57 patients (64.4%), followed by the mixed subtype in 19 patients (21.3%) and lastly the acrofacial vitiligo in 13 patients (14.6%). Forty three patients reported stressful events in life the last six months before the study. Concerning the disease activity; 7 (7.8%), 20 (22.4%), 32 (35.9%) and 30 (33.7%) patients showed VIDA 1, 2, 3 and 4, respectively.

### Oxidative stress markers

The plasma TAC and MDA levels were measured in both groups as indicators of the oxidative stress status. As shown in Table 1, the included vitiligo patients exhibited significantly lower TAC along with significantly higher MDA levels compared with control subjects. However, no significant differences were observed in the measured levels of the plasma TAC and MDA among the different clinical subtypes. The mean TAC level (SD) was found to be 1.36(0.3) mM in the vitiligo vulgaris patients, 1.1(0.25) mM in

the acrofacial patients and 1.26(0.13) mM in those with mixed vitiligo ( $p = 0.1$ ). Furthermore, the mean MDA level (SD) was 5.7(1.2), 6.01(0.5) and 5.1(0.42) nmol/ml among the patients with vitiligo vulgaris, acrofacial and mixed subtypes, respectively ( $p = 0.07$ ). Additionally, no significant correlations were detected between any of the demographic data or clinical variables and the studied markers.

### Genotype distribution of *CAT* and *COMT* polymorphisms among the cases and controls

The genotype and allele frequencies of the exon 9 T/C polymorphism in the patients and controls are presented in Table 2. No difference in genotypic and allelic frequencies was observed between both groups. The frequency of the TT genotype was relatively lower among the patients with vitiligo than controls (15.7 vs 22.2%,  $p = 0.1$ ). Meanwhile, the frequency of the combined C variant genotypes (TC+CC) was quite higher among the patients (84.2%) than among the controls (77.7%) ( $p = 0.06$ ). When the TT genotype was used as the reference, the combined C variant genotypes were not associated with a higher risk of vitiligo (OR: 0.7; 95% CI: 0.4–1.49). The distribution of all genotypes among patients was in agreement with the Hardy-Weinberg equilibrium ( $\chi^2 = 0.61$ ,  $p = 0.73$ ) (Table 2).

As indicated in Table 3, genotype and allele distributions of *COMT* 158 G/A polymorphism in vitiligo patients were not significantly different from those of controls. Similarly, the frequency of the *COMT* 158 variant A allele was not significantly different among the patients and the controls (47.2 vs 47.2%,  $p = 1.0$ ). The frequency of the combined 158 A variant genotypes (GA+AA) was insignificantly higher among the cases (74.1%) than the controls (70%) ( $p = 0.5$ ). When the GG genotype was used as the reference, the combined genotypes were not associated with a higher risk of vitiligo (OR: 1.02; 95% CI: 0.6–1.6). The distribution of all *COMT* genotypes among patients was in agreement with the Hardy-Weinberg equilibrium ( $\chi^2 = 0.79$ ,  $p = 0.67$ ) (Table 3).

### Association between *CAT* and *COMT* polymorphisms with demographic and clinical data of vitiligo patients

A logistic regression analysis was performed to test the association of *CAT* exon 9 T/C polymorphism and *COMT* 158 G/A polymorphisms with different demographic and clinical characteristics of patients as presented in Tables 4 and 5. Our results revealed that the combined C variant genotypes of *CAT* (TC+CC) and the combined *COMT* 158 A variant genotypes (GA+AA) were not associated with higher risk of development of generalized vitiligo among patients with late onset, positive family history, male or female sex or patients with stressful events.

## Discussion

Oxidative stress is regarded as one of the possible culprits in the complex multifactorial pathogenesis of vitiligo [8,13,41]. The present study demonstrated an enhanced oxidative stress status in

**Table 2. Genotype and allele frequencies of CAT exon 9 T/C polymorphism in the vitiligo patients and controls and association with the risk of vitiligo.**

| CAT genotype (T/C) | Vitiligo patients (N = 89) N (%) | Controls (N = 90) N (%) | p-value | CAT alleles | Vitiligo (%) | Control (%) | p-value | Odds ratio (95% CI) |
|--------------------|----------------------------------|-------------------------|---------|-------------|--------------|-------------|---------|---------------------|
| TT                 | 14 (15.7)                        | 20 (22.2)               | 0.1     | T           | 38.2         | 37.8        | 0.4     | 0.7                 |
| TC                 | 40 (44.9)                        | 28 (31.1)               |         | C           | 61.8         | 62.2        |         | (0.4–1.49)          |
| CC                 | 35 (39.3)                        | 42 (46.7)               |         | *HWE        |              |             |         |                     |
| TC+CC              | 75 (84.2)                        | 70 (77.7)               | 0.06    | $\chi^2$    | 0.61         |             | 0.73    |                     |

Data are reported as number with percent in parentheses.

\*HWE = Hardy-Weinberg equilibrium, 95% CI: 95% confidence interval.

doi:10.1371/journal.pone.0099286.t002

**Table 3. Genotype and allele frequencies of COMT 158 G/A polymorphism among vitiligo patients and controls and association with the risk of vitiligo.**

| COMT genotype | Vitiligo patients N = 89 N (%) | Controls N = 90 N (%) | p-value | COMT alleles | Vitiligo (%) | Control (%) | p-value | Odds ratio (95% CI) |
|---------------|--------------------------------|-----------------------|---------|--------------|--------------|-------------|---------|---------------------|
| GG            | 23(25.8)                       | 27(30)                | 0.5     | G            | 52.8         | 52.8        | 1.0     | 1.02                |
| GA            | 48(53.9)                       | 41(45.6)              |         | A            | 47.2         | 47.2        |         | (0.6–1.6)           |
| AA            | 18(20.2)                       | 22(24.4)              |         | *HWE         |              |             |         |                     |
| GA+AA         | 66(74.1)                       | 63(70)                | 0.5     | $\chi^2$     | 0.79         |             | 0.67    |                     |

Data are reported as number with percent in parentheses.

\*HWE = Hardy-Weinberg equilibrium, 95% CI: 95% confidence interval.

doi:10.1371/journal.pone.0099286.t003

**Table 4. The frequency of the wild and combined genotypes of the T/C exon 9 polymorphism of CAT gene among vitiligo patients and the association with risk of vitiligo.**

| Variable              | Vitiligo patients N = 89 | Wild type (TT) N (%) | Combined genotypes (TC+CC) N (%) | Odds ratio (95% CI) | p-value |
|-----------------------|--------------------------|----------------------|----------------------------------|---------------------|---------|
| <b>Onset</b>          |                          |                      |                                  |                     |         |
| Early <sup>1</sup>    | 27                       | 5(18.5)              | 22(81.5)                         | 1.6                 | 1.0     |
| Late                  | 62                       | 5(8.1)               | 57(91.9)                         | (0.17–15.9)         |         |
| <b>Family history</b> |                          |                      |                                  |                     |         |
| Yes                   | 26                       | 6(23.1)              | 20(76.9)                         | 0.23                | 0.1     |
| No                    | 63                       | 7(11.1)              | 56(88.8)                         | (0.03–1.5)          |         |
| <b>Gender</b>         |                          |                      |                                  |                     |         |
| Male                  | 28                       | 4(14.2)              | 24(85.7)                         | 0.32                | 0.3     |
| Female                | 61                       | 10(16.4)             | 51(83.6)                         | (0.05–2.1)          |         |
| <b>Stress</b>         |                          |                      |                                  |                     |         |
| Yes                   | 43                       | 13(30.2)             | 30(69.8)                         | 0.16                | 0.1     |
| No                    | 46                       | 10(21.7)             | 36(78.3)                         | (0.01–1.5)          |         |

Data are reported as number with percent in parentheses. 95% CI: 95% confidence interval.

<sup>1</sup>Early onset subgroup means vitiligo occurred before 20 years old and the late-onset subgroup means vitiligo occurred after 20 years old.

doi:10.1371/journal.pone.0099286.t004

the blood of the Egyptian vitiligo patients as evidenced by a significant reduction in TAC along with a significant increase in plasma MDA levels of patients compared to controls. This is in accordance with the study of Khan et al. who found significantly higher MDA levels and lower total blood antioxidants levels in the serum of Indian vitiligo patients [42]. Also, Jain et al. revealed that MDA levels were significantly raised while those of vitamin E, uric acid and ceruloplasmin were significantly lowered in blood of vitiligo patients [43]. Similarly, Singh et al. showed decreased total antioxidant status in the serum of Indian vitiligo patients [44]. Furthermore, increased lipid peroxidation level and superoxide dismutase activity were reported by Laddha et al. in blood of vitiligo patients in a Gujarat population [45].

The inheritance of vitiligo cannot be explained by simple Mendelian pattern. It is a polygenic disease characterized by

multiple susceptibility loci, genetic heterogeneity and incomplete penetrance with gene-gene and gene-environment interactions [46]. Strong evidence indicates that certain genes including those involved in response to oxidative stress and melanin synthesis are crucial for the development of vitiligo [47]. Thus, we investigated *CAT* exon 9 T/C polymorphism as a candidate susceptibility locus for vitiligo in an Egyptian population. We found no association between *CAT* gene polymorphism and vitiligo susceptibility in the Egyptian vitiligo patients. Similarly, lack of such association has been demonstrated in a Turkish and a Chinese population [48–50]. Furthermore, the distributions of T/C exon 9 genotype and allele frequencies were not significantly different between vitiligo patients and healthy controls in a Korean and a Gujarat population [23,26].

**Table 5. The frequency of the wild and combined genotypes of the COMT 158 G/A polymorphism among vitiligo patients and the association with risk of vitiligo.**

| Variable              | Vitiligo patients N = 89 | Wild type (GG) N (%) | Combined genotypes (GA+AA) N (%) | Odds ratio (95% CI) | p-value |
|-----------------------|--------------------------|----------------------|----------------------------------|---------------------|---------|
| <b>Onset</b>          |                          |                      |                                  |                     |         |
| Early <sup>1</sup>    | 27                       | 5 (18.5)             | 22(81.5)                         | 1.7                 | 0.3     |
| Late                  | 62                       | 18 (29.1)            | 44(70.9)                         | (0.49–6.1)          |         |
| <b>Family history</b> |                          |                      |                                  |                     |         |
| Yes                   | 26                       | 5 (19.2)             | 21 (80.8)                        | 1.6                 | 0.4     |
| No                    | 63                       | 18 (28.6)            | 45 (71.4)                        | (0.45–5.6)          |         |
| <b>Gender</b>         |                          |                      |                                  |                     |         |
| Male                  | 28                       | 5 (17.9)             | 23 (82.1)                        | 1.9                 | 0.3     |
| Female                | 61                       | 17 (27.9)            | 44 (72.1)                        | (0.54–6.6)          |         |
| <b>Stress</b>         |                          |                      |                                  |                     |         |
| Yes                   | 43                       | 11 (25.6)            | 32 (74.4)                        | 0.8                 | 0.8     |
| No                    | 46                       | 11 (24)              | 35 (76)                          | (0.3–2.6)           |         |

Data are reported as number with percent in parentheses. 95% CI: 95% confidence interval.

<sup>1</sup>Early onset subgroup means vitiligo occurred before 20 years old and the late-onset subgroup means vitiligo occurred after 20 years old.

doi:10.1371/journal.pone.0099286.t005

However, the 389 T/C *CAT* polymorphism has been associated with susceptibility to vitiligo in a North American population and an English population [22,24]. Moreover, a recent meta-analysis has found a significant correlation between this SNP and the risk of vitiligo [25]. In our opinion, the absence of an association between *CAT* gene polymorphism and vitiligo susceptibility in the Egyptian vitiligo patients does not argue with the postulated role of oxidative stress in such disease, it just diminishes the value of expression of those particular genotypes in our population, and points to the involvement of other gene mutations in the disrupted oxidative pathway. Still, larger scale studies are required to clarify such a statement.

COMT plays an important role in the metabolism of drugs, neurotransmitters and catecholamines [51,52]. Aberrant discharge of catecholamines plus the less active *COMT* allele (108/158 Met) were suggested to have an etiological role in vitiligo induction and development through generating toxic radicals in the melanocytes microenvironment; a hypothesis that needs to be tested in further functional studies [53,54]. Therefore, we evaluated the role of the 158 G/A *COMT* functional polymorphism in the increased risk of vitiligo in an Egyptian population. We found no association between the *COMT* genotypes and the risk of vitiligo. Likewise, the frequencies of allele A were not significantly different between the vitiligo cases and healthy controls. However, previous reports investigating such association were inconsistent [33,52]. The Turkish in contrast to the Han Chinese exhibited an association between 158 G/A *COMT* polymorphism and acrofacial vitiligo. On the other hand, the 158 G/A *COMT* polymorphism was found

to be associated with other clinical types of vitiligo in the Han Chinese but not in the Turkish [33,52]. Importantly, a comprehensive meta-analysis of candidate genes for generalized vitiligo documented a lack of association between 389 T/C *CAT* or 158 G/A *COMT* and vitiligo susceptibility [55]. It is conceivable that such inconsistency in results may be partially attributed to racial and ethnic variations, or different sample sizes in each study.

In summary, we found an enhanced oxidative stress status in the blood of the Egyptian patients with generalized vitiligo. However, we found no association between *CAT* exon 9 T/C or 158 G/A *COMT* polymorphisms and susceptibility to vitiligo in the Egyptian population. Further studies with greater sample size should be performed to verify these results. Additionally, examining more SNPs in other genes related to the oxidative pathway may be helpful in offering a better understanding of the etiology of vitiligo in the Egyptian population.

## Acknowledgments

We would like to acknowledge the Diabetic Endocrine Metabolic Pediatric Unit laboratory at Cairo University for providing the equipment used in the molecular analysis of the study.

## Author Contributions

Conceived and designed the experiments: DAM RAH MME. Performed the experiments: DAM MMN HAD MME. Analyzed the data: AMT HIG. Contributed reagents/materials/analysis tools: DAM HAD RAH MMN AMT HIG MME. Wrote the paper: DAM HAD MMN MME.

## References

- Passeron T, Ortonne JP (2005) Physiopathology and genetics of vitiligo. *J Autoimmun* 25 Suppl: 63–68.
- Malhotra N, Dytoc M (2013) The pathogenesis of vitiligo. *J Cutan Med Surg* 17: 153–172.
- Dell'anna ML, Picardo M (2006) A review and a new hypothesis for non-immunological pathogenetic mechanisms in vitiligo. *Pigment Cell Res* 19: 406–411.
- Gauthier Y, Cario Andre M, Taieb A (2003) A critical appraisal of vitiligo etiologic theories. Is melanocyte loss a melanocytorrhagy? *Pigment Cell Res* 16: 322–332.
- Westerhof W, Manini P, Napolitano A, d'Ischia M (2011) The haptenation theory of vitiligo and melanoma rejection: a close-up. *Exp Dermatol* 20: 92–96.
- Mandelcorn-Monson RL, Shear NH, Yau E, Sambhara S, Barber BH, et al. (2003) Cytotoxic T lymphocyte reactivity to gp100, MelanA/MART-1, and tyrosinase, in HLA-A2-positive vitiligo patients. *J Invest Dermatol* 121: 550–556.
- Pichler R, Sfetsos K, Badics B, Gutenbrunner S, Berg J, et al. (2009) Lymphocyte imbalance in vitiligo patients indicated by elevated CD4+/CD8+ T-cell ratio. *Wien Med Wochenschr* 159: 337–341.
- Schallreuter KU, Wood JM, Berger J (1991) Low catalase levels in the epidermis of patients with vitiligo. *J Invest Dermatol* 97: 1081–1085.
- Sravani PV, Babu NK, Gopal KV, Rao GR, Rao AR, et al. (2009) Determination of oxidative stress in vitiligo by measuring superoxide dismutase and catalase levels in vitiliginous and non-vitiliginous skin. *Indian J Dermatol Venereol Leprol* 75: 268–271.
- Maresca V, Roccella M, Roccella F, Camera E, Del Porto G, et al. (1997) Increased sensitivity to peroxidative agents as a possible pathogenic factor of melanocyte damage in vitiligo. *J Invest Dermatol* 109: 310–313.
- Schallreuter KU, Elwary S (2007) Hydrogen peroxide regulates the cholinergic signal in a concentration dependent manner. *Life Sci* 80: 2221–2226.
- Schallreuter KU, Gibbons NC, Zothner C, Abou Elloof MM, Wood JM (2007) Hydrogen peroxide-mediated oxidative stress disrupts calcium binding on calmodulin: more evidence for oxidative stress in vitiligo. *Biochem Biophys Res Commun* 360: 70–75.
- Schallreuter KU, Moore J, Wood JM, Beazley WD, Peters EM, et al. (2001) Epidermal H<sub>2</sub>O<sub>2</sub> accumulation alters tetrahydrobiopterin (6BH<sub>4</sub>) recycling in vitiligo: identification of a general mechanism in regulation of all 6BH<sub>4</sub>-dependent processes? *J Invest Dermatol* 116: 167–174.
- Schallreuter KU, Rubsam K, Gibbons NC, Maitland DJ, Chavan B, et al. (2008) Methionine sulfoxide reductases A and B are deactivated by hydrogen peroxide (H<sub>2</sub>O<sub>2</sub>) in the epidermis of patients with vitiligo. *J Invest Dermatol* 128: 808–815.
- Laddha NC, Dwivedi M, Mansuri MS, Gani AR, Ansarullah M, et al. (2013) Vitiligo: interplay between oxidative stress and immune system. *Exp Dermatol* 22: 245–250.
- Birlea SA, Ahmad FJ, Uddin RM, Ahmad S, Pal SS, et al. (2013) Association of generalized vitiligo with MHC class II loci in patients from the Indian subcontinent. *J Invest Dermatol* 133: 1369–1372.
- Singh A, Sharma P, Kar HK, Sharma VK, Tembhre MK, et al. (2012) HLA alleles and amino-acid signatures of the peptide-binding pockets of HLA molecules in vitiligo. *J Invest Dermatol* 132: 124–134.
- Spritz RA (2011) Recent progress in the genetics of generalized vitiligo. *J Genet Genomics* 38: 271–278.
- Spritz RA (2008) The genetics of generalized vitiligo. *Curr Dir Autoimmun* 10: 244–257.
- Goth L, Eaton JW (2000) Hereditary catalase deficiencies and increased risk of diabetes. *Lancet* 356: 1820–1821.
- Goth L, Rass P, Madarasi I (2001) A novel catalase mutation detected by polymerase chain reaction-single strand conformation polymorphism, nucleotide sequencing, and western blot analyses is responsible for the type C of Hungarian acatalasemia. *Electrophoresis* 22: 49–51.
- Casp CB, She JX, McCormack WT (2002) Genetic association of the catalase gene (*CAT*) with vitiligo susceptibility. *Pigment Cell Res* 15: 62–66.
- Em S, Laddha NC, Chatterjee S, Gani AR, Malek RA, et al. (2007) Association of catalase T/C exon 9 and glutathione peroxidase codon 200 polymorphisms in relation to their activities and oxidative stress with vitiligo susceptibility in Gujarat population. *Pigment Cell Res* 20: 405–407.
- Gavalas NG, Akhtar S, Gawkrödger DJ, Watson PF, Weetman AP, et al. (2006) Analysis of allelic variants in the catalase gene in patients with the skin depigmenting disorder vitiligo. *Biochem Biophys Res Commun* 345: 1586–1591.
- Lv YJ, Liao WJ, Luan Q, Wang H, Wang L, et al. (2011) The polymorphism of catalase T/C codon 389 in exon 9 and vitiligo susceptibility: a meta-analysis. *J Eur Acad Dermatol Venereol* 25: 955–958.
- Park HH, Ha E, Uhm YK, Jin SY, Kim YJ, et al. (2006) Association study between catalase gene polymorphisms and the susceptibility to vitiligo in Korean population. *Exp Dermatol* 15: 377–380.
- Pavel S, Muskiet FA, de Ley L, The TH, van der Slik W (1983) Identification of three indolic compounds in a pigmented-melanoma cell-culture supernatant by gas chromatography-mass spectrometry. *J Cancer Res Clin Oncol* 105: 275–279.
- Lundstrom K, Tenhunen J, Tilgmann C, Karhunen T, Panula P, et al. (1995) Cloning, expression and structure of catechol-O-methyltransferase. *Biochim Biophys Acta* 1251: 1–10.
- Tunbridge EM (2010) The catechol-O-methyltransferase gene: its regulation and polymorphisms. *Int Rev Neurobiol* 95: 7–27.
- Andersen S, Skorpen F (2009) Variation in the COMT gene: implications for pain perception and pain treatment. *Pharmacogenomics* 10: 669–684.
- Harrison PJ, Tunbridge EM (2008) Catechol-O-methyltransferase (COMT): a gene contributing to sex differences in brain function, and to sexual dimorphism

- in the predisposition to psychiatric disorders. *Neuropsychopharmacology* 33: 3037–3045.
32. Foltynie T, Goldberg TE, Lewis SG, Blackwell AD, Kolachana BS, et al. (2004) Planning ability in Parkinson's disease is influenced by the COMT val158met polymorphism. *Mov Disord* 19: 885–891.
  33. Li K, Li C, Gao L, Yang L, Li M, et al. (2009) A functional single-nucleotide polymorphism in the catechol-O-methyltransferase gene alter vitiligo risk in a Chinese population. *Arch Dermatol Res* 301: 681–687.
  34. Njoo MD, Das PK, Bos JD, Westerhof W (1999) Association of the Kobner phenomenon with disease activity and therapeutic responsiveness in vitiligo vulgaris. *Arch Dermatol* 135: 407–413.
  35. Roberti J, Harrington L, Storch E (2006) Further psychometric support for the 10-Item version of the perceived stress scale *Journal of College Counseling* 9: 135–147.
  36. Kawakami T, Hashimoto T (2011) Disease severity indexes and treatment evaluation criteria in vitiligo. *Dermatol Res Pract* 2011: 750342.
  37. Lahiri DK, Schnabel B (1993) DNA isolation by a rapid method from human blood samples: effects of MgCl<sub>2</sub>, EDTA, storage time, and temperature on DNA yield and quality. *Biochem Genet* 31: 321–328.
  38. Koracevic D, Koracevic G, Djordjevic V, Andrejevic S, Cosic V (2001) Method for the measurement of antioxidant activity in human fluids. *J Clin Pathol* 54: 356–361.
  39. Mihara M, Uchiyama M (1978) Determination of malonaldehyde precursor in tissues by thiobarbituric acid test. *Anal Biochem* 86: 271–278.
  40. Erdal ME, Tot S, Yazici K, Yazici A, Herken H, et al. (2003) Lack of association of catechol-O-methyltransferase gene polymorphism in obsessive-compulsive disorder. *Depress Anxiety* 18: 41–45.
  41. Arican O, Kurutas EB (2008) Oxidative stress in the blood of patients with active localized vitiligo. *Acta Dermatovenerol Alp Panonica Adriat* 17: 12–16.
  42. Khan R, Satyam A, Gupta S, Sharma VK, Sharma A (2009) Circulatory levels of antioxidants and lipid peroxidation in Indian patients with generalized and localized vitiligo. *Arch Dermatol Res* 301: 731–737.
  43. Jain D, Misra R, Kumar A, Jaiswal G (2008) Levels of malondialdehyde and antioxidants in the blood of patients with vitiligo of age group 11–20 years. *Indian J Physiol Pharmacol* 52: 297–301.
  44. Singh S, Singh U, Pandey S (2011) Study of total antioxidants status in Indian vitiligo patients. *Egyptian Dermatol Online J* 7 1–7.
  45. Laddha NC, Dwivedi M, Gani AR, Shajil EM, Begum R (2013) Involvement of superoxide dismutase isoenzymes and their genetic variants in progression of and higher susceptibility to vitiligo. *Free Radic Biol Med* 65C: 1110–1125.
  46. Zhang XJ, Chen JJ, Liu JB (2005) The genetic concept of vitiligo. *J Dermatol Sci* 39: 137–146.
  47. Shajil EM, Chatterjee S, Agrawal D, Bagchi T, Begum R (2006) Vitiligo: pathomechanisms and genetic polymorphism of susceptible genes. *Indian J Exp Biol* 44: 526–539.
  48. Liu L, Li C, Gao J, Li K, Zhang R, et al. (2010) Promoter variant in the catalase gene is associated with vitiligo in Chinese people. *J Invest Dermatol* 130: 2647–2653.
  49. Akbas H, Dertlioglu SB, Dilmeç F, Balkan M (2013) No association between catalase (CAT) gene polymorphisms and susceptibility to vitiligo in a Turkish population. *Clin Ter* 164: e173–177.
  50. Bulut H, Pehlivan M, Alper S, Tomatir AG, Onay H, et al. (2011) Lack of association between catalase gene polymorphism (T/C exon 9) and susceptibility to vitiligo in a Turkish population. *Genet Mol Res* 10: 4126–4132.
  51. Lachman HM, Papolos DF, Saito T, Yu YM, Szumlanski CL, et al. (1996) Human catechol-O-methyltransferase pharmacogenetics: description of a functional polymorphism and its potential application to neuropsychiatric disorders. *Pharmacogenetics* 6: 243–250.
  52. Tursen U, Kaya TI, Erdal ME, Deric E, Gunduz O, et al. (2002) Association between catechol-O-methyltransferase polymorphism and vitiligo. *Arch Dermatol Res* 294: 143–146.
  53. Boisseau-Garsaud AM, Garsaud P, Lejoly-Boisseau H, Robert M, Quist D, et al. (2002) Increase in total blood antioxidant status and selenium levels in black patients with active vitiligo. *Int J Dermatol* 41: 640–642.
  54. Ines D, Sonia B, Riadh BM, Amel el G, Slaheddine M, et al. (2006) A comparative study of oxidant-antioxidant status in stable and active vitiligo patients. *Arch Dermatol Res* 298: 147–152.
  55. Birlea SA, Jin Y, Bennett DC, Herbstman DM, Wallace MR, et al. (2011) Comprehensive association analysis of candidate genes for generalized vitiligo supports XBP1, FOXP3, and TSLP. *J Invest Dermatol* 131: 371–381.
